# Supplementary material
Source: PubMed Central journal article supplement (PMC9687553)
Supplement: joces-135-259980-s1.pdf [file joces-135-259980-s1.pdf]

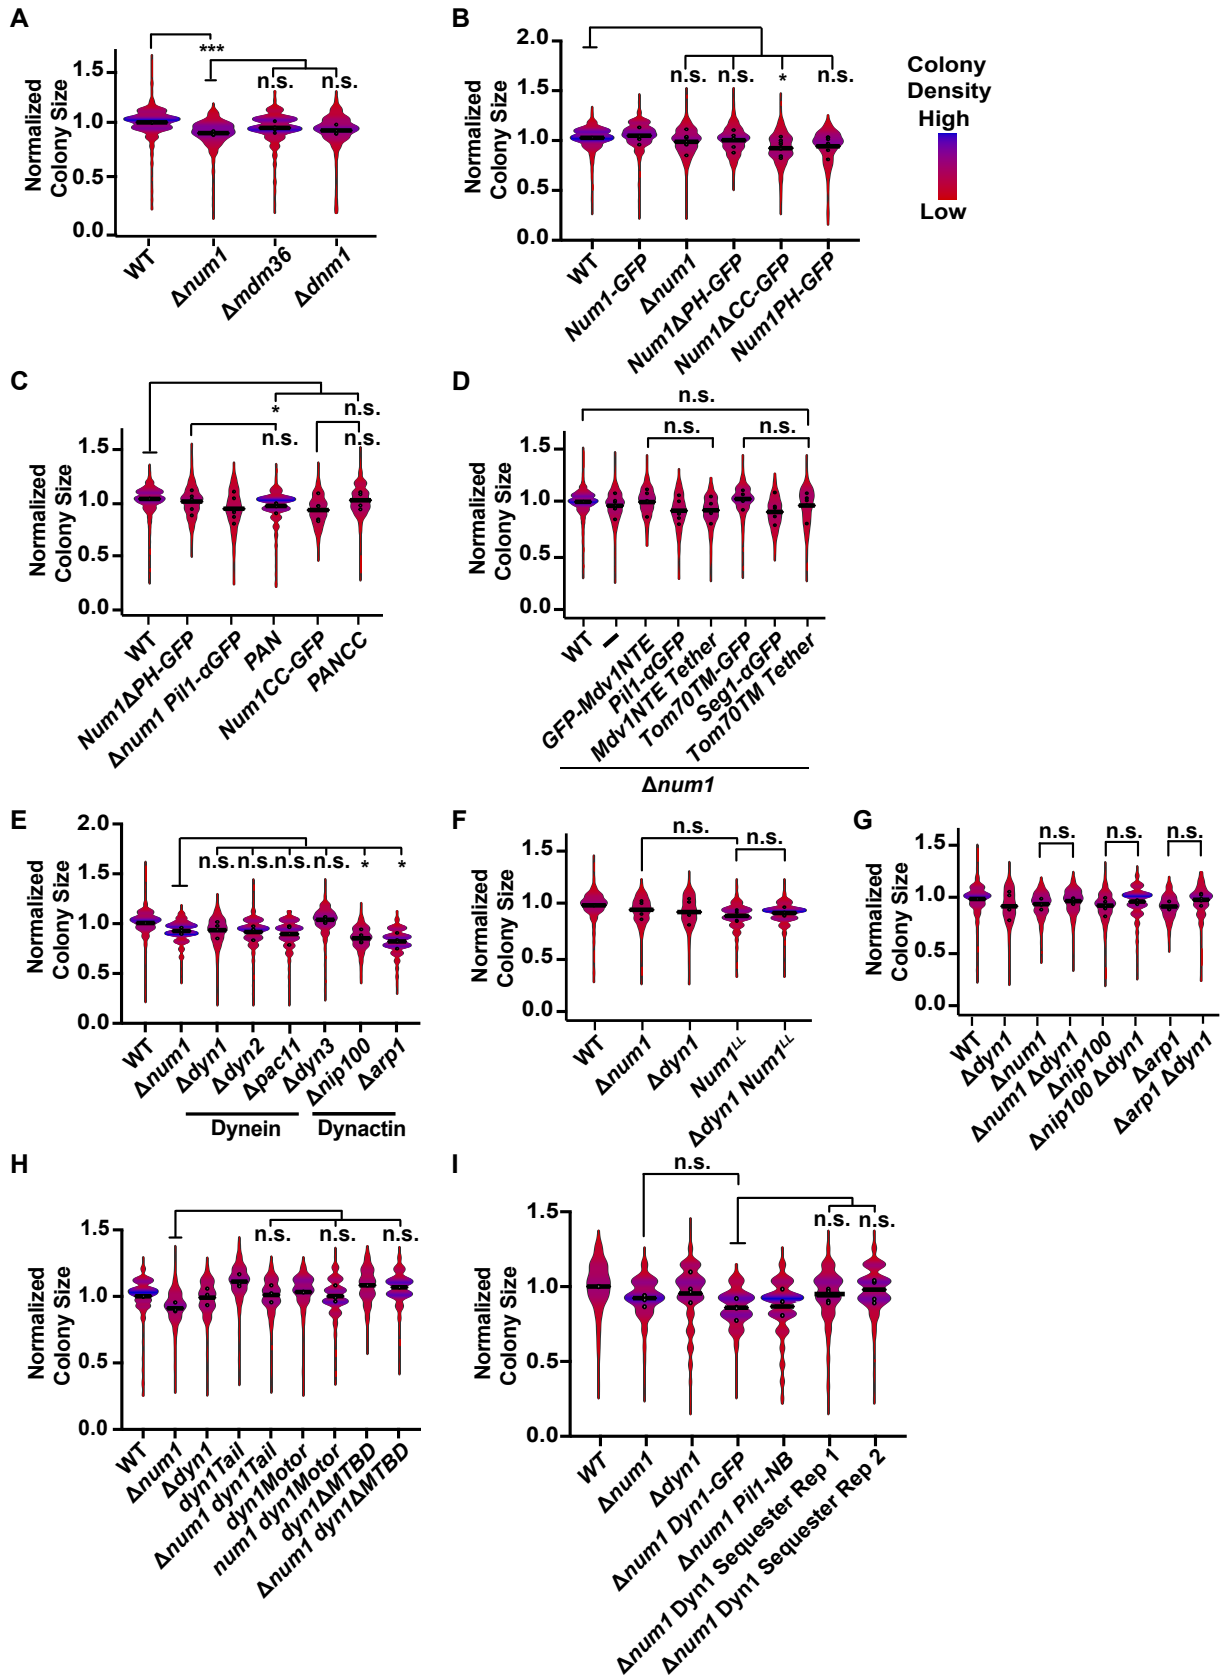

**Fig. S1. Quantification of fermentative growth for strains used in the study.** (A-I) Quantification of growth at 35°C in fermentative (YPD) growth conditions as described in Figure 1E. The panels correspond to the respiratory growth data shown in the following figures: Figure 1E (A), Figure 2B (B), Figure 2F (C), Figure 3D (D), Figure 4A (E), Figure 5B (F), Figure 5D (G), Figure 5F (H), and Figure 6C. \*\*\*  $p \leq 0.001$ , \*  $p \leq 0.05$ , n.s.=not significant



3 independent experiments, each shown in a different color. Black line denotes grand mean. WT data are recapitulated from Fig. 1B for comparison. \*\*\*\* $p \leq 0.0001$ , \*\*  $p \leq 0.01$ , n.s.=not significant. (B) Serial dilutions of WT,  $\Delta num1$ , and  $\Delta mdm36$  cells onto YPD (fermentative growth condition) or YPEG (respiratory growth condition) agar plates grown at 30°C, 35°C, 37°C, as indicated.



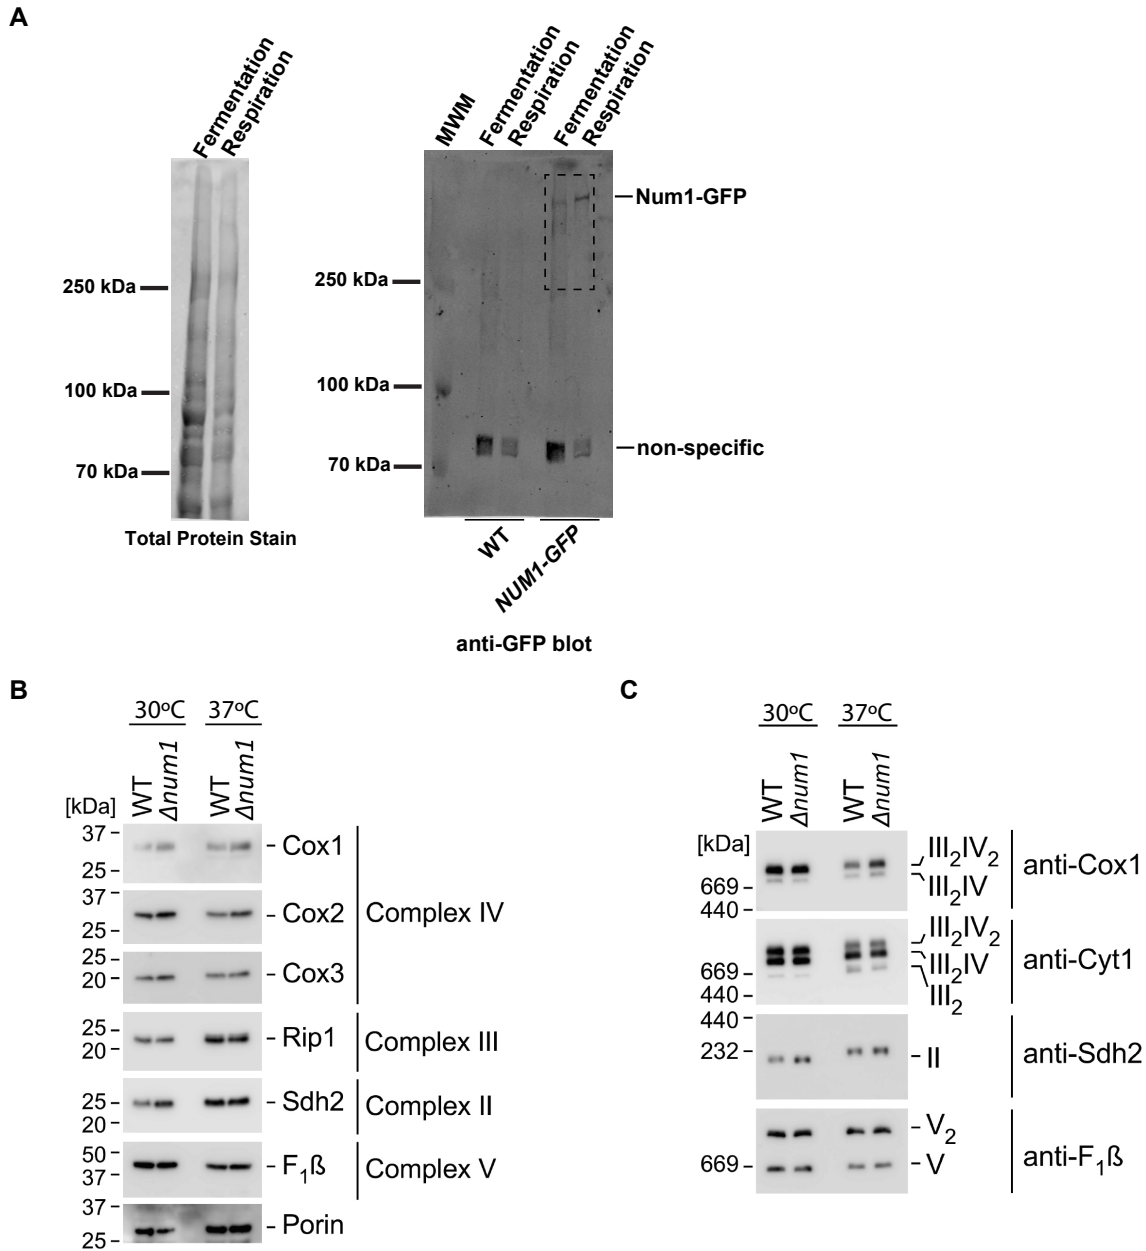

**Fig. S3. Loss of Num1 function does not impact respiratory complex formation.** (A) Total protein stain image (left panel) and extended anti-GFP blot (right panel) of the membrane used for the western blot shown in Figure 1C. The portion of the anti-GFP blot that is shown in Figure 1C is indicated. (B) Steady-state levels of representative subunits of respiratory Complexes IV (Cox1–Cox3), III (Rip1), II (Sdh2), and V (F<sub>1</sub>β) along with porin (loading control) in mitochondria of WT and  $\Delta num1$  cells grown at the indicated temperatures analyzed by SDS-PAGE immunoblotting with appropriate antibodies. Positions of molecular mass markers are indicated on the left side of the blots. (C) Blue native-PAGE immunoblotting of digitonin-solubilized

mitochondrial lysates from WT and  $\Delta num1$  cells grown at the indicated temperatures were used to examine respiratory supercomplex assembly, particularly the assembly of Complex III (anti-Cyt1 immunoblot) and Complex IV (anti-Cox1 immunoblot) into a III<sub>2</sub>/IV<sub>2</sub> tetramer and a III<sub>2</sub>/IV trimer. Positions of molecular mass markers are indicated on the left side of the blots.

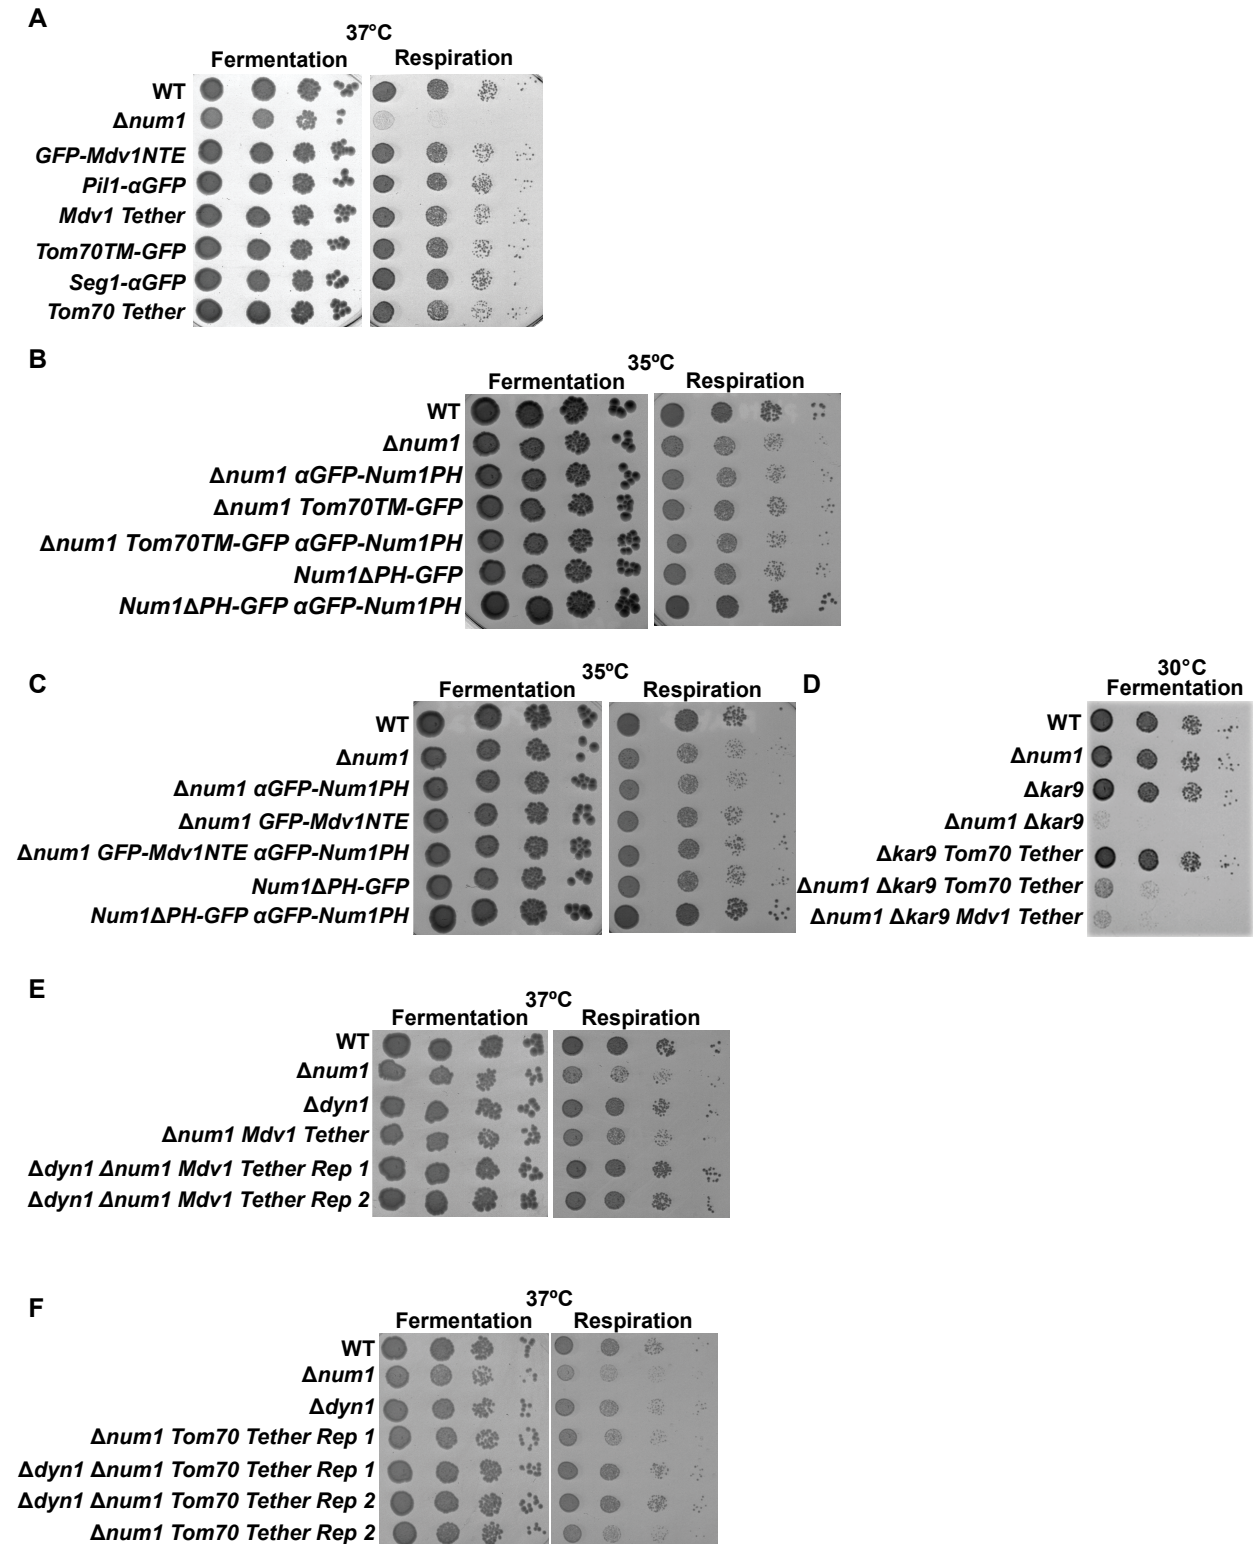

**Fig. S4. Additional characterization of artificial, Num1-independent mitochondria-plasma membrane tethers.** (A) Serial dilutions of WT,  $\Delta num1$ , GFP-MDV1NTE, PIL1- $\alpha$ GFP, MDV1 Tether, TOM70TM-GFP, SEG1- $\alpha$ GFP, and TOM70 Tether onto YPD (fermentative growth

condition) or YPEG (respiratory growth condition) at 37°C. (B and C) Serial dilutions of WT,  $\Delta num1$ ,  $\Delta num1$   $\alpha$ GFP-Num1PH,  $\Delta num1$  Tom70TM-GFP (B)/GFP-Mdv1NTE (C),  $\Delta num1$  Tom70TM-GFP (B)/GFP-Mdv1NTE (C)  $\alpha$ GFP-Num1PH, Num1 $\Delta$ PH-GFP, and  $\alpha$ GFP-Num1PH Num1 $\Delta$ PH-GFP cells were spotted onto YPD (fermentative growth condition) or YPEG (respiratory growth condition) agar plates and grown at 35°C. (D) Serial dilutions of WT,  $\Delta num1$ ,  $\Delta kar9$ ,  $\Delta num1$   $\Delta kar9$ ,  $\Delta kar9$  TOM70 Tether mito-dsRED,  $\Delta num1$   $\Delta kar9$  TOM70 Tether mito-dsRED, and  $\Delta num1$   $\Delta kar9$  MDV1 Tether onto YPD (fermentative growth condition) agar plates grown at 30°C. (E and F) Serial dilutions of WT,  $\Delta num1$ ,  $\Delta dyn1$ ,  $\Delta num1$  Mdv1 Tether (E)/ $\Delta num1$  Tom70 Tether (F), and  $\Delta num1$   $\Delta dyn1$  Mdv1 Tether (E)/ $\Delta num1$   $\Delta dyn1$  Tom70 Tether (F) onto YPD and YPEG (agar plates grown at 37°C. Rep 1 and 2 denote two independent isolates of the indicated genotype.

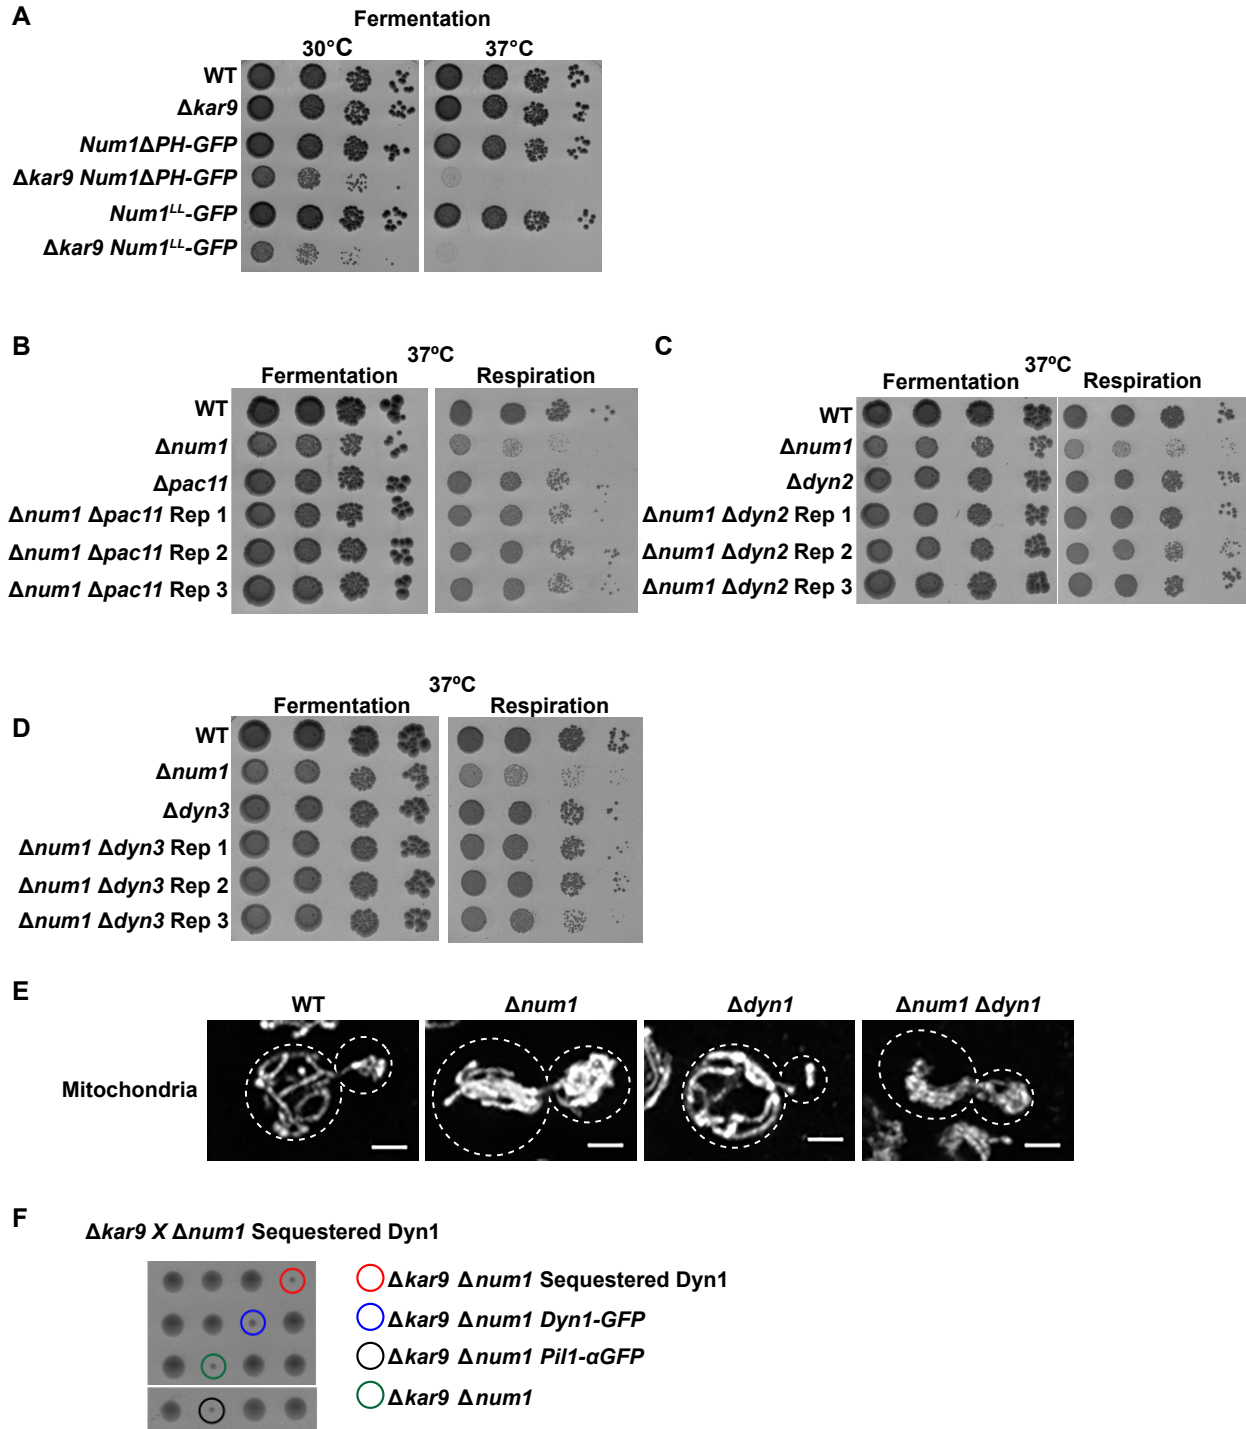

**Fig. S5. Additional characterization of Num1<sup>LL</sup>, dynein mutants, and eisosome-sequestered Dyn1.** (A) Serial dilutions of WT,  $\Delta kar9$ ,  $Num1\Delta PH-GFP$ ,  $\Delta kar9 NUM1\Delta PH-GFP$ ,  $NUM1^{LL}-GFP$ , and  $\Delta kar9 NUM1^{LL}-GFP$  onto YPD (fermentative growth condition) agar plates grown at 30°C and 37°C. (B-D) To supplement the colony size assays shown in Figure 5D, serial dilutions of the indicated strains were spotted onto YPD (fermentative growth condition) or YPEG

(respiratory growth condition) agar plates and grown at 37°C. Rep 1, 2 and 3 denote three independent isolates of the indicated genotype. (E) WT,  $\Delta num1$ ,  $\Delta dyn1$ , and  $\Delta num1 \Delta dyn1$  cells expressing mito-dsRED were grown in respiratory growth conditions and analyzed by fluorescence microscopy. Whole cell, maximum intensity projections are shown. Dashed white lines denote the outline of the cell. Bar = 2  $\mu$ m. (F)  $\Delta kar9 \Delta num1 PIL1-\alpha GFP DYN1-GFP$  diploid cells were sporulated, and spores from individual tetrads were arranged in a row on YPD medium. Growth on selective plates was used to score the markers for the deletions and  $\alpha GFP$  and  $yEGFP$  fusions. The relevant genotypes are indicated.

**Table S1. List of strains used in this study**

| Strain #            | Genotype                                                                    | Source                  |
|---------------------|-----------------------------------------------------------------------------|-------------------------|
| 92/93               | W303 ( <i>ade2-1; leu2-3; his3-11,15; trp1-1; ura3-1; can1-100</i> )        |                         |
| 27/28               | W303 $\Delta$ num1::HIS                                                     | Ping et al. 2016        |
| 58                  | W303 $\Delta$ dnm1::KAN                                                     | Lackner et al. 2013     |
| 144                 | W303 $\Delta$ dnm1::NAT Num1-yEGFP::KAN                                     | Lackner et al. 2013     |
| 148                 | W303 $\Delta$ mdm36::NAT Num1-yEGFP::HIS                                    | Lackner et al. 2013     |
| 153                 | W303 Num1-yEGFP::KAN                                                        | Lackner et al. 2013     |
| 177                 | W303 $\Delta$ arp1::HIS                                                     | This study              |
| 180                 | W303 $\Delta$ nip100::HIS                                                   | This study              |
| 330/2168            | W303 $\Delta$ kar9::NAT                                                     | Kraft and Lackner, 2017 |
| 331                 | W303 $\Delta$ dyn2::NAT                                                     | This study              |
| 401                 | W303 $\Delta$ mdm36::HIS                                                    | Ping et al. 2016        |
| 647/648             | W303 $\Delta$ num1::KAN                                                     | Kraft and Lackner, 2017 |
| 1184                | <i>Pil1-LaG16::CaURA3</i>                                                   | Schmit et al. 2018      |
| 1187                | W303 Num1 $\Delta$ PH-yEGFP::HIS <i>Pil1-LaG16::CaURA3</i>                  | Schmit et al. 2018      |
| 1541/4876           | W303 $\Delta$ dyn1::NAT                                                     | Kraft and Lackner, 2017 |
| 1862                | W303 Num1 $\Delta$ CC-yEGFP::HIS                                            | This study              |
| 1906                | W303 $\Delta$ kar9::NAT NUM1 $\Delta$ PH-yEGFP::HIS                         | Schmit et al. 2018      |
| 2033                | W303 Num1 $\Delta$ PH-yEGFP::HIS                                            | Schmit et al. 2018      |
| 2264                | W303 $\Delta$ num1::HIS <i>Pil1-LaG16::CaURA3</i>                           | This study              |
| 2276                | W303 Num1CC-yEGFP::HIS                                                      | Anderson et al. 2022    |
| 2278                | W303 NumCC-yEGFP::HIS <i>Pil1-LaG16::CaURA3</i>                             | Anderson et al. 2022    |
| 2944                | W303 $\Delta$ num1::KAN <i>CYC1::Tom70TM-yEGFP::TRP1</i>                    | This study              |
| 2974                | W303 $\Delta$ num1::KAN <i>CYC1::yEGFP-Mdv1NTE::TRP1</i>                    | This study              |
| 2975                | W303 $\Delta$ num1::HIS <i>CYC1::yEGFP-Mdv1NTE::TRP1 Pil1-LaG16::CaURA3</i> | This study              |
| 3163                | W303 $\Delta$ num1::KAN <i>Seg1-LaG16::CaURA3</i>                           | This study              |
| 3179                | <i>Seg1-LaG16::CaURA3</i>                                                   | This study              |
| 3273                | W303 $\Delta$ num1::KAN <i>CYC1::Tom70TM-yEGFP::TRP1 Seg1-LaG16::CaURA3</i> | This study              |
| 3352                | W303 $\Delta$ num1::KAN <i>mito-dsRED::LEU/NAT</i>                          | This study              |
| 3356/4957/4958/4959 | W303 Num1 <sup>LL</sup> -yEGFP::HIS                                         | This study              |
| 3397                | W303 $\Delta$ kar9::HIS Num1 <sup>LL</sup> -GFP::HIS                        | This study              |
| 3411                | W303 <i>mito Red::LEU/NAT</i>                                               | This study              |
| 3617                | W303 Num1 <sup>LL</sup> -GFP::HIS <i>mito-dsRED::LEU/NAT</i>                | This study              |
| 3619                | W303 Num1-GFP::KAN <i>mito-dsRED::LEU/NAT</i>                               | This study              |



|                |                                                                                         |                    |
|----------------|-----------------------------------------------------------------------------------------|--------------------|
| 3620           | W303 <i>Num1CC-GFP::HIS Pil1-LaG16::CaURA3 mito-dsRED::LEU/NAT</i>                      | This study         |
| 3621           | W303 <i>Num1ΔPH-GFP::HIS Pil1-LaG16::CaURA3 mito-dsRED::LEU/NAT</i>                     | This study         |
| 3703           | W303 <i>Num1ΔPH-GFP::HIS LaG16::CaURA3-Num1PH</i>                                       | This study         |
| 3705           | W303 <i>Num1CC-GFP::HIS LaG16::CaURA3-Num1PH</i>                                        | This study         |
| 3730           | W303 <i>CYC1::Tom70TM-yEGFP::TRP1 Seg1-LaG16::CaURA3</i>                                | This study         |
| 3731           | W303 <i>CYC1::Tom70TM-yEGFP::TRP1</i>                                                   | This study         |
| 3732           | W303 <i>CYC1::yEGFP-Mdv1NTE::TRP1</i>                                                   | This study         |
| 3733           | W303 <i>CYC1::yEGFP-Mdv1NTE::TRP1 Pil1-LaG16::CaURA3</i>                                | This study         |
| 3734           | W303 <i>CYC1::Tom70TM-yEGFP::TRP1 LaG16::CaURA3-Num1PH</i>                              | This study         |
| 3737           | W303 <i>CYC1::yEGFP-Mdv1NTE::TRP1 LaG16::CaURA3-Num1PH</i>                              | This study         |
| 3748           | W303 <i>Δnum1::KAN LaG16::CaURA3-Num1PH</i>                                             | This study         |
| 4042           | W303 <i>Δnum1::HIS CYC1::yEGFP-Mdv1NTE::TRP1 Pil1-LaG16::CaURA3 mito-dsRED::LEU/NAT</i> | This study         |
| 4092           | W303 <i>Δpac11::HIS</i>                                                                 | This study         |
| 4094           | W303 <i>Δnum1::KAN CYC1::Tom70TM-yEGFP::TRP1 Seg1-LaG16::CaURA3 mito-dsRED::LEU/NAT</i> | This study         |
| 4106           | W303 <i>Δnip100::HIS Num1-yEGFP::KAN mito-dsRED::LEU/NAT</i>                            | This study         |
| 4107           | W303 <i>Δarp1::HIS Num1-yEGFP::KAN mito-dsRED::LEU/NAT</i>                              | This study         |
| 4226           | W303 <i>Δnum1::KAN CYC1::yEGFP-Mdv1NTE::TRP1 mito-dsRED::LEU/NAT</i>                    | This study         |
| 4227           | W303 <i>Num1CC-yEGFP::HIS mito-dsRED::LEU/NAT</i>                                       | This study         |
| 4229           | W303 <i>Δmdm36::NAT Num1-yEGFP::HIS mito-dsRED::LEU/NAT</i>                             | This study         |
| 4230           | W303 <i>Δnum1::KAN CYC1::Tom70TM-yEGFP::TRP1 mito-dsRED::LEU/NAT</i>                    | This study         |
| 4231           | W303 <i>Num1ΔPH-yEGFP::HIS mito-dsRED::LEU/NAT</i>                                      | This study         |
| 4305/4306/4307 | W303 <i>Δnum1::HIS Δdyn1::NAT</i>                                                       | This study         |
| 5560/5561/5562 | W303 <i>Δnum1::HIS Δdyn2::NAT</i>                                                       | This study         |
| 4311/4312/4313 | W303 <i>Δnum1::HIS Δpac11::HIS</i>                                                      | This study         |
| 4315/4316/4317 | W303 <i>Δdyn1::NAT Δnip100::HIS</i>                                                     | This study         |
| 4318/4319/4320 | W303 <i>Δdyn1::NAT Δarp1::HIS</i>                                                       | This study         |
| 4465           | yJM1494 <i>dyn1ΔMTBD(Δ3102-3225) Tub1-GFP::LEU</i>                                      | Estrem et al. 2017 |
| 4472           | W303 <i>Δnum1::HIS Δdyn1::NAT mito-dsRED::LEU/NAT</i>                                   | This study         |



|                |                                                                                                                               |            |
|----------------|-------------------------------------------------------------------------------------------------------------------------------|------------|
| 4657/4658      | W303 <i>dyn1Tail-3XFLAG::HIS</i>                                                                                              | This study |
| 4630/5507      | W303 $\Delta$ <i>num1::KAN dyn1Tail-3XFLAG::HIS</i>                                                                           | This study |
| 4843/4844      | W303 <i>dyn1Motor-3XFLAG::HIS</i>                                                                                             | This study |
| 4846/4847      | W303 $\Delta$ <i>num1::KAN dyn1Motor-3XFLAG::HIS</i>                                                                          | This study |
| 4929/4930/4931 | W303 $\Delta$ <i>dyn1::NAT Num1<sup>LL</sup>-yEGFP::HIS</i>                                                                   | This study |
| 4963           | W303 <i>CYC1::Tom70mito-yEGFP::TRP1 Seg1-LaG16::CaURA3 <math>\Delta</math>kar9::NAT mito-dsRED:LEU/NAT</i>                    | This study |
| 4964           | W303 $\Delta$ <i>num1::KAN CYC1::Tom70mito-yEGFP::TRP1 Seg1-LaG16::CaURA3 <math>\Delta</math>kar9::NAT mito-dsRED:LEU/NAT</i> | This study |
| 4965           | W303 $\Delta$ <i>num1::HIS CYC1::yEGFP-Mdv1(1-241)::TRP1 Pil1-LaG16::CaURA3 <math>\Delta</math>kar9::NAT</i>                  | This study |
| 5068           | W303 $\Delta$ <i>dnm1::NAT Num1-yEGFP::KAN mitoRed::NAT/LEU</i>                                                               | This study |
| 5104           | W303 $\Delta$ <i>dyn1::NAT mito-dsRED::LEU/NAT</i>                                                                            | This study |
| 5176/5177      | W303 $\Delta$ <i>num1::HIS Dyn1-yEGFP::KAN Pil1-LaG16::CaURA3</i>                                                             | This study |
| 5184           | W303 $\Delta$ <i>num1::KAN Dyn1-yEGFP::KAN</i>                                                                                | This study |
| 5354/5355      | W303 $\Delta$ <i>dyn3::KAN</i>                                                                                                | This study |
| 5376/5377/5407 | W303 $\Delta$ <i>dyn3::KAN <math>\Delta</math>num1::HIS</i>                                                                   | This study |
| 5468/5469      | W303 <i>Num1PH-GFP::HIS</i>                                                                                                   | This study |
| 5466/5467      | W303 <i>dyn1<math>\Delta</math>MTBD-3XFLAG::HIS</i>                                                                           | This study |
| 5500/5501/5508 | W303 $\Delta$ <i>num1::KAN dyn1<math>\Delta</math>MTBD-3XFLAG::HIS</i>                                                        | This study |

**Table S2. List of primers used in this study**

| Primer # | Name                           | Sequence (5' → 3')                                                                     |
|----------|--------------------------------|----------------------------------------------------------------------------------------|
| 156      | Arp1 F1                        | GCTATACCACGAATTGAGGAATTAGAAAGAAAGTTAGCCACGG<br>ATCCCCGGGTAAATTA                        |
| 157      | Arp1 R1                        | GCTATTTATAACAAATATGCTTGAAAAATCTAACGACTCTGTTT<br>CGAATTCGAGCTCGTTTAAAC                  |
| 163      | Nip100 F1                      | GATTCGATCTCCATCAACCTCGCAGTACAGCCTTGGACAACGG<br>ATCCCCGGGTAAATTA                        |
| 164      | Nip100 R1                      | CCATTTATTTACTGTATTTGAATGTTATAGACCTGCTAGAATCA<br>CTCAGGAATTCGAGCTCGTTTAAAC              |
| 177      | Num1 F5                        | GACATAGAGTACCACAAAGCCGATCATTTGGCAATTTACGAGG<br>TGACGGTGCTGGTTTA                        |
| 178      | Num1 R3                        | GATTATTATTGTTCTTAATTTACTTAGAGTTATTTAGTTTTTTTAA<br>TCGATGAATTCGAGCTCG                   |
| 270      | Dyn1 F5                        | CGAACGTCTTCAGGCTAAAGAGGTGGCTAGCTCAACTGAACAA<br>CTTCTTCAAGAAATGGGTGACGGTGCTGGTTTA       |
| 271      | Dyn1 R3                        | GAATAGGCACGTCCACTGAGAAAACCGCGGACAAGCAAGACA<br>CGCGTACCTGAAAAGGTCGATGAATTCGAGCTCG       |
| 435      | Num1<br>aa288-303<br>fwd       | GAAGTATTATCAAAAACAGCATACTTCCGATACTACAGTAACAT<br>C                                      |
| 436      | Num1<br>aa288-303<br>rev       | GATGTTACTGTAGTATCGGAAGTATGCTGTTTTTGATAAATACTT<br>C                                     |
| 513      | Num1<br>upstream<br>into gene  | CGAGTAAAGACGCAACGGTCAAGGCTTCCACGAGACGTTCCG<br>AATATGTCCCACAACAACAGGCATAAAAAGAATAAC     |
| 514      | Num1 end<br>no stop            | TCGTAAATTGCCAAATGATCGGCTTTGTGGTACTCTATGTC                                              |
| 614      | Dyn1<br>upstream<br>into gene  | CAGAGCTTAAATTGGAAAGTACGTCAAACGTTTTTTTAGGCAAT<br>GTGCAAGAATGAGGCAAGACTTGC               |
| 617      | Dyn1 end<br>no stop            | CATTTCTTGAAGAAGTTGTTTCAGTTGAGCTAGCCACCTCTTTAG<br>CCTGAAGACGTTCCG                       |
| 742      | Num1<br>upstream<br>into aa295 | CGAGTAAAGACGCAACGGTCAAGGCTTCCACGAGACGTTCCG<br>AATATGCATACTTCCGATACTACAGTAACATCTGATCCTG |
| 1103     | 5' BglII-<br>yEGFP             | GAAGATCTATGTCTAAAGGTGAAGAATTATTC                                                       |
| 1104     | 3' XhoI-<br>Mdv1 NTE<br>1-241  | GCAGCTCGAGTCAATTTAAAACTCTAAACTATTTACAAGAG                                              |
| 1449     | Dyn1 Verify<br>7455 bp<br>Rev  | CAAATTCTCGAATTCTTAAAAGTTCC                                                             |

|      |                                                 |                                                                                    |
|------|-------------------------------------------------|------------------------------------------------------------------------------------|
| 1450 | Dyn1 Verify<br>7300 bp<br>Fwd                   | CGTCTATGTTATTGATACAAAAGTTC                                                         |
| 1459 | Pac11 F1                                        | CAGTTGGTTAATCAACCAAAGAGGAAGAAGGATTGAAACATTA<br>AGCGGATCCCCGGGTTAATTAA              |
| 1460 | Pac11 R1                                        | GAAATTAATCATCAGGCAATAACCTATGCTCACCCGCCTCGAA<br>GCGGCGGAATTCGAGCTCGTTTAAAC          |
| 1723 | Dyn1<br>aa1363 F5                               | CAATTTAACTTTAAATGAAATACTACTTACAAAGATTATAGAAAG<br>AGCCCAAAGGGTGACGGTGCTGGTTTA       |
| 1778 | Dyn3 F1                                         | CCGCAACTTGTACAAAAGAAAAGAAGATAAAAGAATTGTATGT<br>ATTACGGATCCCCGGGTTAATTAA            |
| 1779 | Dyn3 R1                                         | CATATAAAGAGAAAAAAATTGCTCATGATAAAAGAAGTATCGCC<br>TGCCCACTTTTGAATTCGAGCTCGTTTAAAC    |
| 1780 | Dyn1<br>Upstream<br>ATG into<br>Motor<br>Domain | CAGAGCTTAAATTGGAAAGTACGTCAAACGTTTTTTTAGGCAAT<br>GGAATTTGTTATAGAAAAGTCTCTGAACAGAATC |
| 1838 | Dyn2 NAT<br>F1                                  | GAAACTGGGAAACGACATAAAGAAGAGCAAATTA AACCAAAG<br>CTTCGTACGCTGCAGGTTCG                |
| 1839 | Dyn2 NAT<br>R1                                  | GTATAATAGTAATTGATTATCGATTA ACTATTGAAGAAACACTAT<br>GTTTTCGACACTGGATGGCG             |
| 1913 | Num1<br>Upstream<br>into PH                     | GACGCAACGGTCAAGGCTTTCCACGAGACGTTTCGAATATGAAC<br>GAACCAAGCATAATACC                  |
